# Supplementary material for: Laterality of Blood Perfusion in the Lower Extremities after Drinking Saline at Different Temperatures
Source: Research Square preprint supplement (doi:10.21203/rs.3.rs-112441/v1), 2020-12-11
Supplement: Supplementary file 2 [file 9475863a3cf4d2d004cd56ee.docx]

**Laterality of Blood Perfusion in the Lower Extremities after Drinking Saline at Different Temperatures**


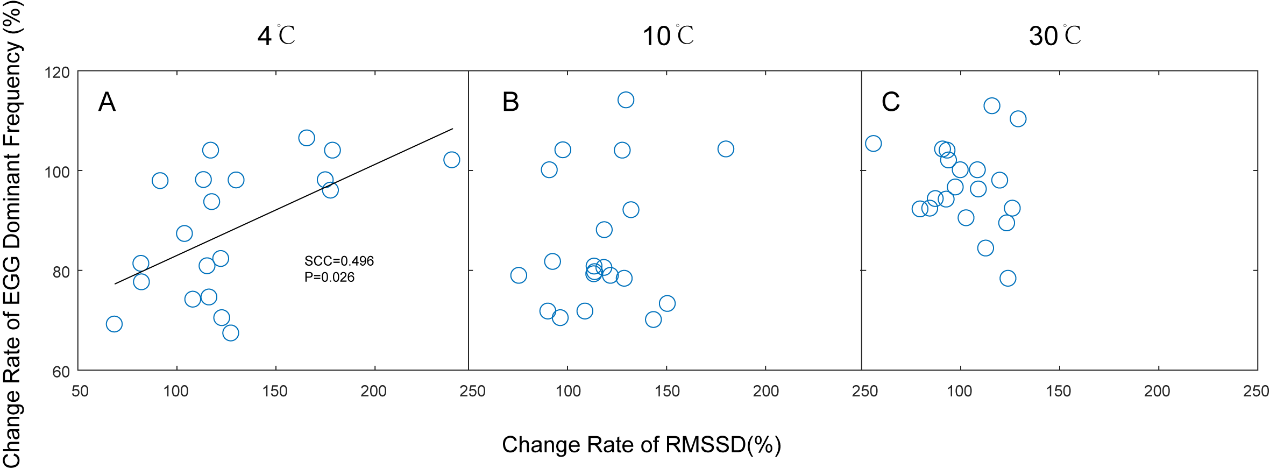


S Fig 1. Relationship between EGG dominant frequency and ECG RMSSD at different temperature saline stimulation. (A). 4℃. SCC=0.496，P=0.026. SCC, Spearman’s correlation coefficient.


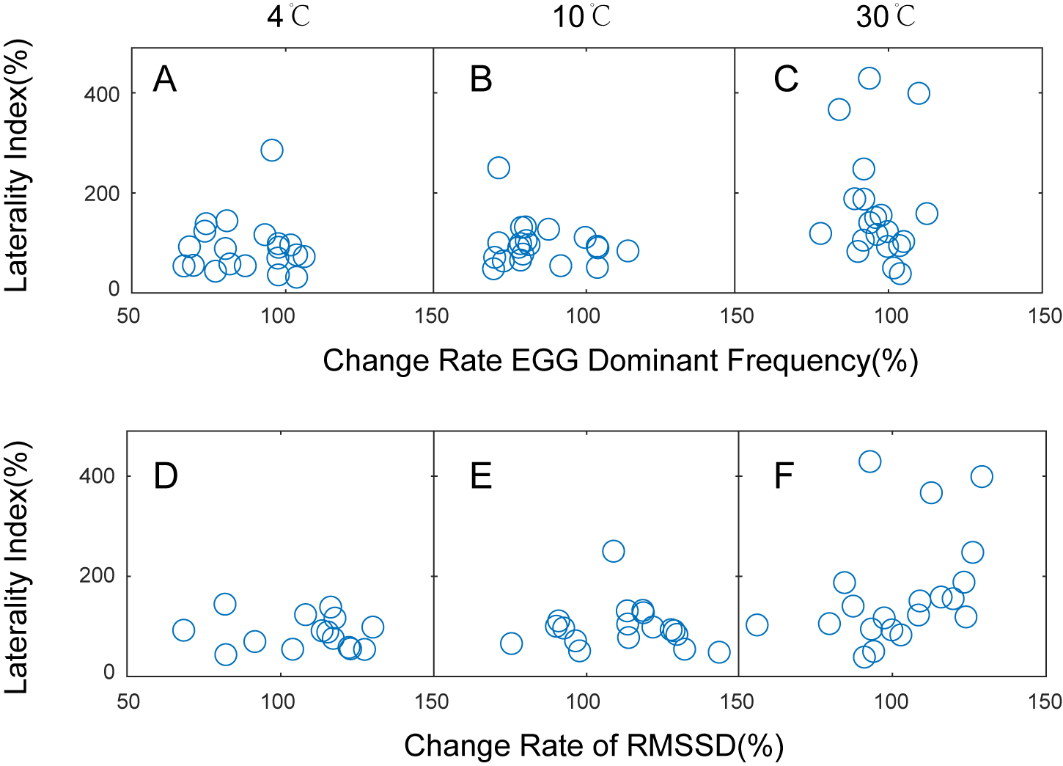


S Fig 2. Relationship between laterality index and EGG dominant frequency or RMSSD


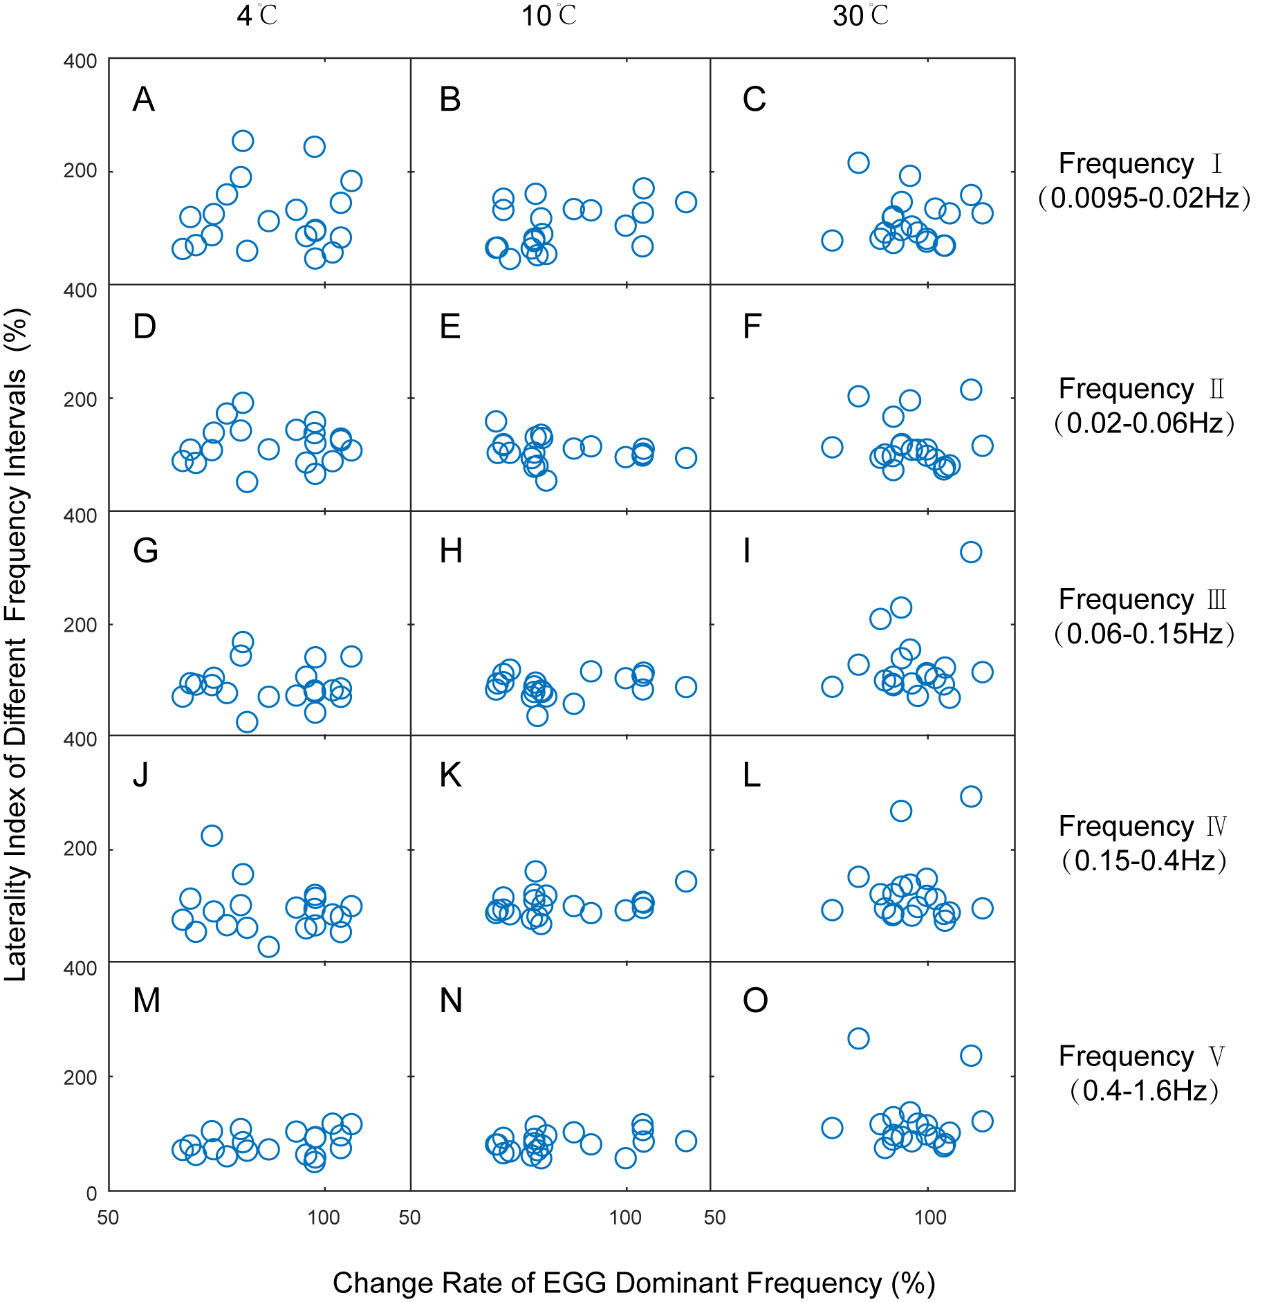


S Fig 3. Relationship between laterality index of frequency intervals and EGG dominant frequency.
